# Supplementary material for: Conservation of Gene Cassettes among Diverse Viruses of the Human Gut
Source: PubMed Central journal article supplement (PMC3416800; doi:10.1371/journal.pone.0042342), 2012-08-10

**Fig S3**

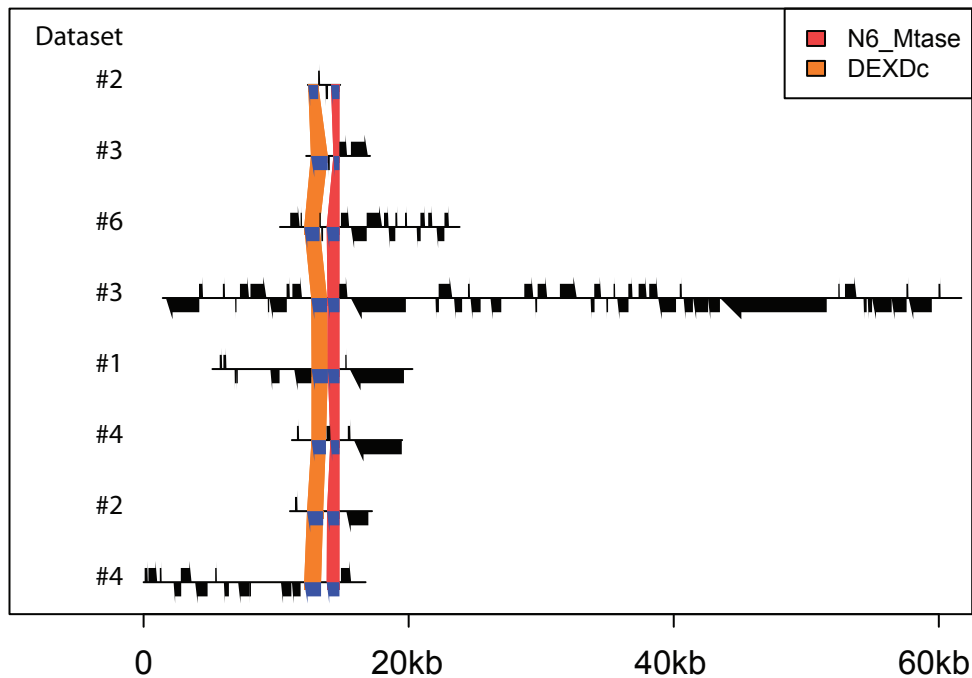

Supplement: pone.0042342.s003.pdf [file pone.0042342.s003.pdf]
